# Supplementary material
Source: PubMed Central journal article supplement (PMC3637034)
Supplement: JCI65708sd.pdf [file JCI65708sd.pdf]

## Supplemental Materials

### Supplemental Figures and Legends

#### Supplemental Figure 1: Structural diagrams of the glycans.

The angle of the lines linking the symbols shows the linkage with a full line ( $\nearrow$ ) showing a  $\beta$ -linkage and a broken line ( $\searrow$ ) showing an  $\alpha$ -linkage.

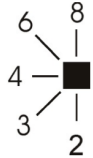

#### Glycans:

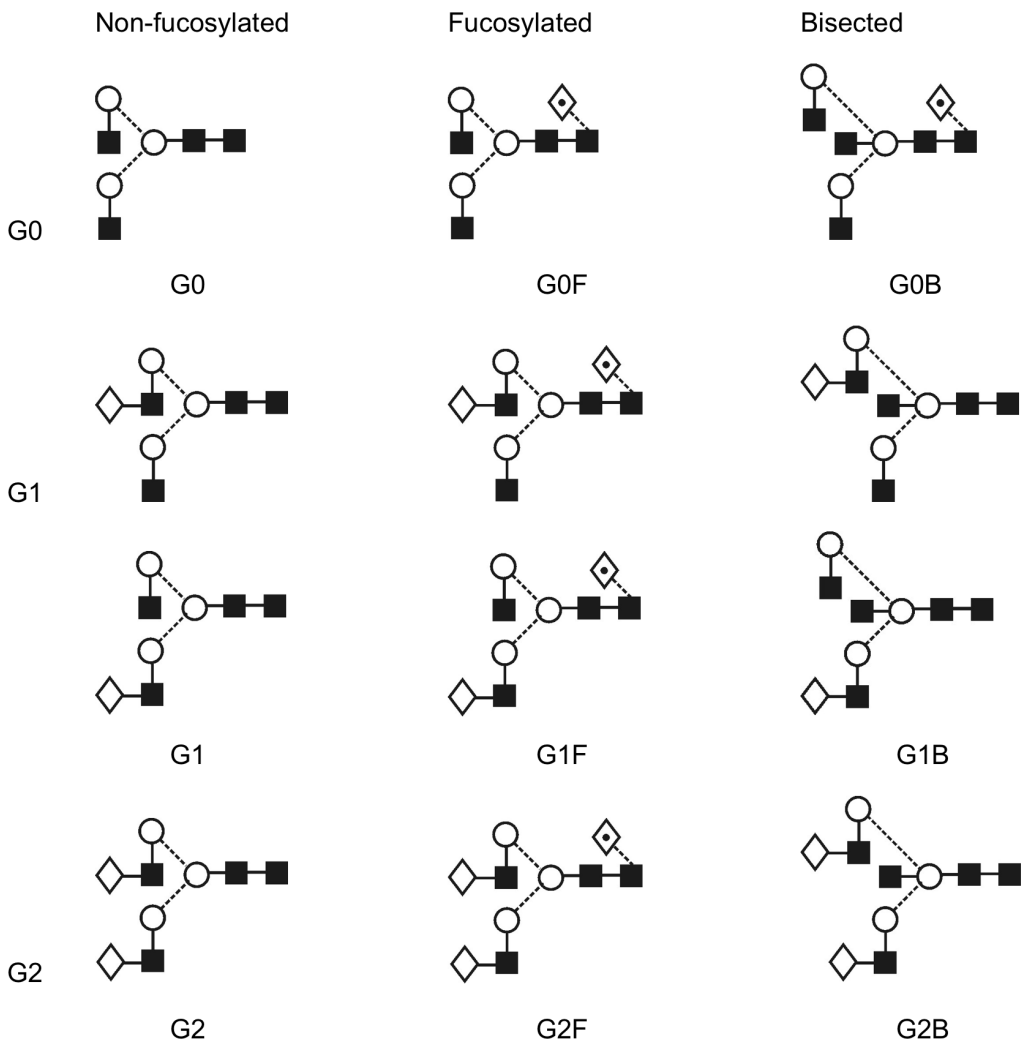

Supplemental Figure 2: Complete glycan prevalence data for HIV-specific IgG.

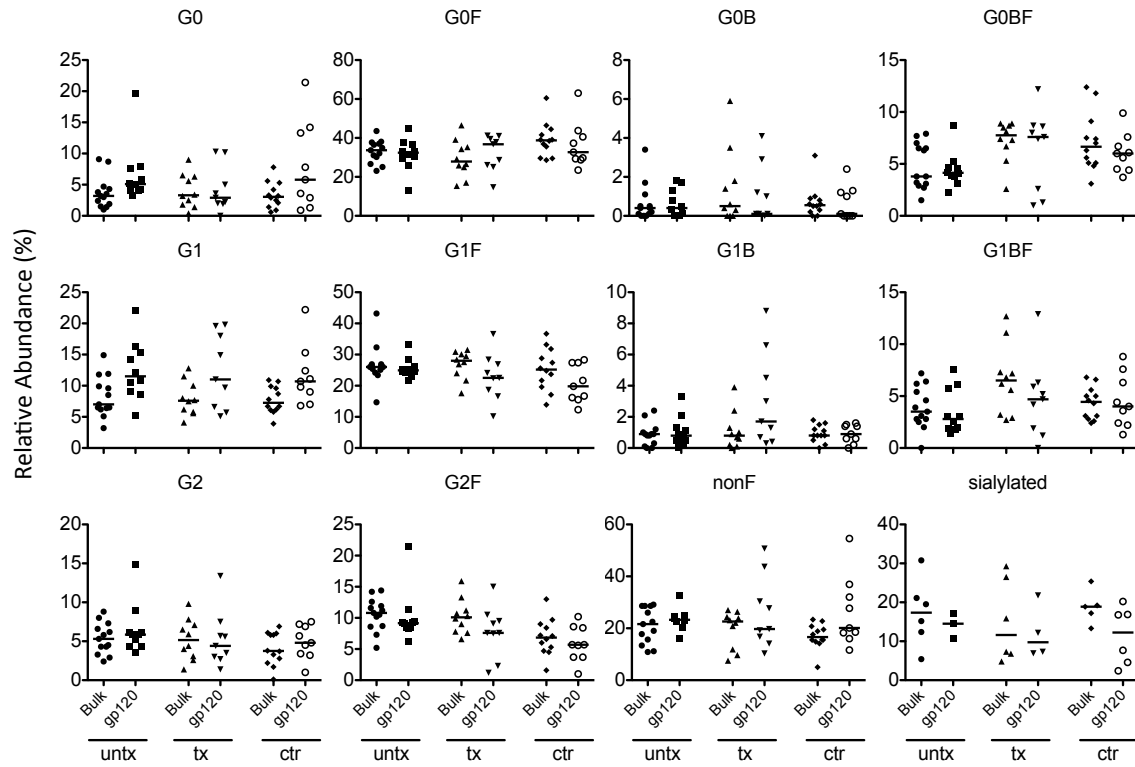

Supplemental Figure 3: Relationship between galactose and sialic acid content.

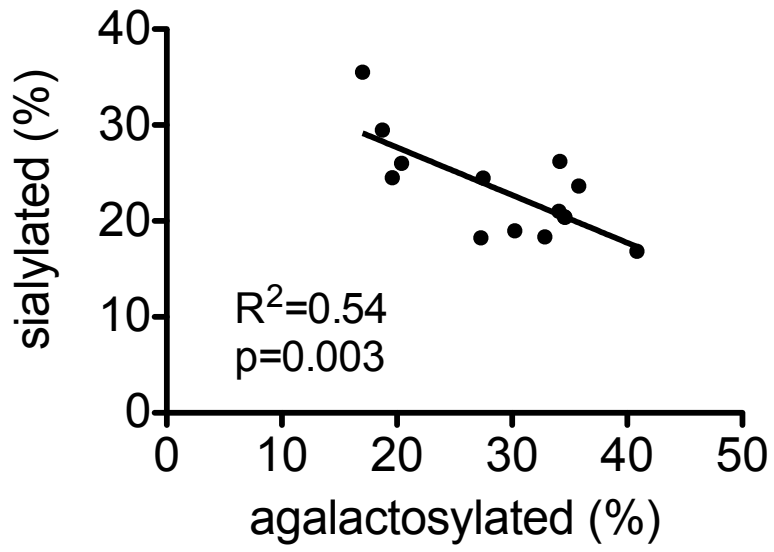

Supplemental Figure 4: Reproducibility of the ADCVI assays across multiple donors assessed on different days.

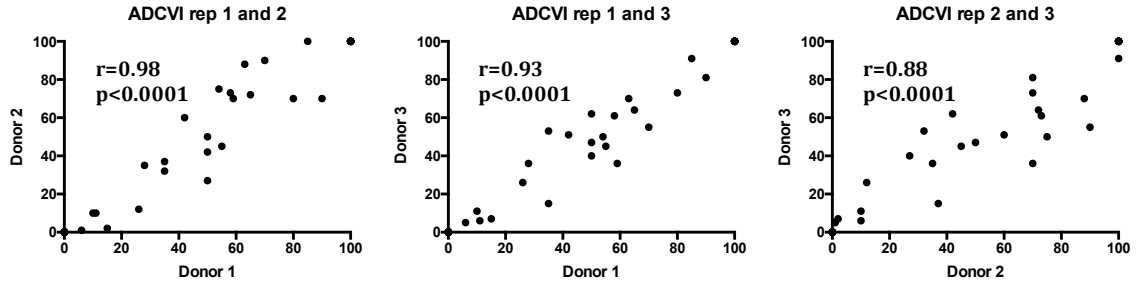

Supplemental Figure 5: Correlation of ADCVI assays results with NK cell degranulation and cytokine secretion.

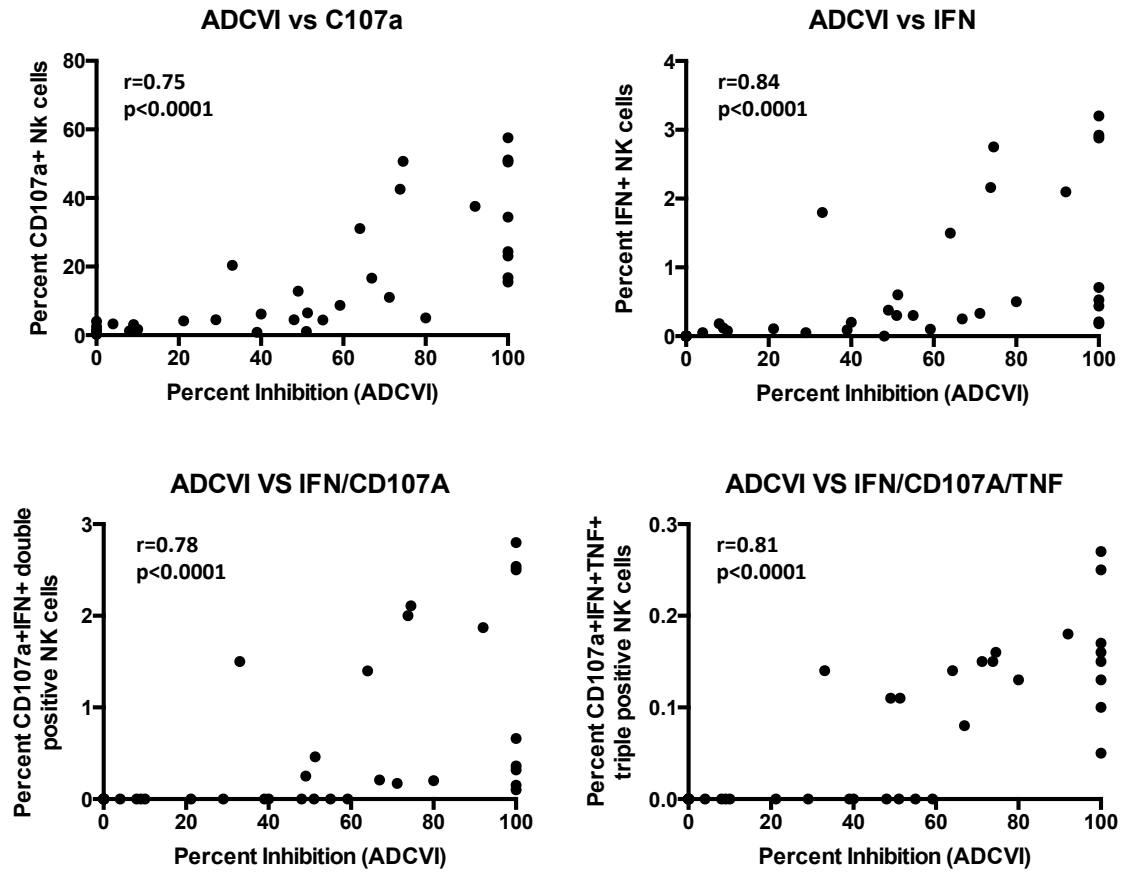

Supplemental Tables

Supplemental Table 1: Subject Characteristics

|                          | <b>Number</b> | <b>Viral Load</b> |                | <b>CD4 Count</b> |              |
|--------------------------|---------------|-------------------|----------------|------------------|--------------|
| <b>Antibody Analysis</b> |               | <b>Mean</b>       | <b>Range</b>   | <b>Mean</b>      | <b>Range</b> |
| Negative                 | 10            |                   |                |                  |              |
| Acute                    | 10            | 130,000           | 16,000-460,000 | 751              | 434-937      |
| Untreated                | 24            | 72,000            | 4,800-650,000  | 445              | 65-973       |
| Treated                  | 24            | <50               | <50-<400       | 1000             | 416-1,674    |
| Controller               | 22            | <50               | 0.2-233        | 874              | 739-1,841    |
|                          |               |                   |                |                  |              |
|                          | <b>Number</b> | <b>Viral Load</b> |                | <b>CD4 Count</b> |              |
| <b>GT Expression</b>     |               | <b>Mean</b>       | <b>Range</b>   | <b>Mean</b>      | <b>Range</b> |
| Negative                 | 13            |                   |                |                  |              |
| Untreated                | 15            | 120,000           | 1,500-710,000  | 670              | 6-1,212      |
| Treated                  | 13            | <50               | <50-2,100      | 515              | 331-1,600    |
| Controller               | 20            | <400              | <50-2,100      | 815              | 436-1,970    |

Supplemental Table 2: Genes considered in glycosyltransferase expression analysis. HGNC gene symbols are used.

| Gene    | Activity                                                                                                                                    |
|---------|---------------------------------------------------------------------------------------------------------------------------------------------|
| ALG2    | Mannosylates Man(2)GlcNAc(2)-dolichol diphosphate and Man(1)GlcNAc(2)-dolichol diphosphate to form Man(3)GlcNAc(2)-dolichol diphosphate     |
| B4GALT1 | Transfers galactose in a beta1,4 linkage to similar acceptor sugars: GlcNAc, Glc, and Xyl.                                                  |
| B4GALT2 | Transfers galactose in a beta1,4 linkage to similar acceptor sugars: GlcNAc, Glc, and Xyl.                                                  |
| B4GALT3 | Transfers galactose in a beta1,4 linkage to similar acceptor sugars: GlcNAc, Glc, and Xyl.                                                  |
| B4GALT4 | Transfers galactose in a beta1,4 linkage to similar acceptor sugars: GlcNAc, Glc, and Xyl.                                                  |
| FUT8    | Catalyzes the addition of fucose in alpha 1-6 linkage to the first GlcNAc residue, next to the peptide chains in N-glycans.                 |
| MGAT1   | Initiates complex N-linked carbohydrate formation. Essential for the conversion of high-mannose to hybrid and complex N-glycans             |
| MGAT2   | Catalyzes an essential step in the conversion of oligo-mannose to complex N-glycans                                                         |
| MGAT3   | Transfers a GlcNAc residue to the beta-linked mannose of the trimannosyl core of N-linked oligosaccharides and produces a bisecting GlcNAc. |
| MGAT4A  | Glycosyltransferase that participates in the transfer of N-acetylglucosamine (GlcNAc) to the core mannose residues of N-linked glycans.     |

|         |                                                                                                                                                       |
|---------|-------------------------------------------------------------------------------------------------------------------------------------------------------|
| MGAT4B  | Glycosyltransferase that participates in the transfer of N-acetylglucosamine (GlcNAc) to the core mannose residues of N-linked glycans.               |
| MGAT4C  | Glycosyltransferase that participates in the transfer of N-acetylglucosamine (GlcNAc) to the core mannose residues of N-linked glycans.               |
| MGAT5   | Catalyzes the addition of N-acetylglucosamine in beta 1-6 linkage to the alpha-linked mannose of biantennary N-linked oligosaccharides.               |
| MGAT5B  | Glycosyltransferase that acts on alpha-linked mannose of N-glycans                                                                                    |
| ST6GAL1 | Catalyzes the transfer of sialic acid from CMP-sialic acid to galactose-containing substrates.                                                        |
| FUCA2   | Catalyzes the hydrolysis of the alpha-1,6-linked fucose joined to the reducing-end N-acetylglucosamine of the carbohydrate moieties of glycoproteins. |
